# Supplementary material
Source: publisher site journal article supplement (https://www.spandidos-publications.com/8421/downloadSupplementary)
Supplement: Supplementary file [file downloadSupplementary]

Table SI. Alkaloids identified from *Fritillaria*.

| Name         | Smiles                                                                                                                                                         |
|--------------|----------------------------------------------------------------------------------------------------------------------------------------------------------------|
| Verticine    | <chem>C[C@H]1CC[C@@]2([H])[C@](O)(C)[C@@]3([H])CC[C@]4([H])[C@@]([H])(C[C@@]5([H])[C@@]4([H])C[C@H]2)[C@]6([H])[C@]5(C)CC[C@H](O)C6)[C@]3([H])CN2C1</chem>     |
| Verticinone  | <chem>O[C@H]1CC[C@@]2(C)[C@](C(C[C@]3([H])[C@]2([H])C[C@]4([H])[C@@]3([H])CC[C@@]5([H])[C@@]4([H])CN6[C@](CC[C@H](C)C6)([H])[C@]5(O)C)=O)([H])C1</chem>        |
| Isoverticine | <chem>O[C@H]1CC[C@]2(C)[C@]3([H])[C@@]([C@@](CC[C@@]4([H])[C@@]5([H])CN6[C@](CC[C@H](C)C6)([H])[C@]4(O)C)([H])[C@@]5([H])C3)([H])C[C@@H](O)[C@]([H])2C1</chem> |
| Zhebeinine   | <chem>O[C@H]1CC[C@]2(C)[C@]3([H])[C@@]([C@@](CC[C@@]4([H])[C@@]5([H])CN6[C@](CC[C@@H](C)C6)([H])[C@]4(O)C)([H])[C@@]5([H])C3)([H])C[C@H](O)[C@]([H])2C1</chem> |
| Taipaienine  | <chem>C[C@@]1(O)CC[C@]2([H])[C@H](C)[C@]3([H])CC[C@@]4([H])[C@]5([H])CC([C@@]6([H])C[C@@H](O)CC[C@]6(C)[C@@]5([H])C[C@@]4([H])[C@]3([H])CN2C1)=O</chem>        |
| Dongbeirine  | <chem>C[C@@H]1CC[C@@]2(C)[C@@H](C)[C@@]3(C)CC[C@@]4(C)[C@]5(C)CC([C@@]6([H])C[C@@H](O)CC[C@]6(C)[C@@]5(C)C[C@@]4(C)[C@]3(C)C2C1)=O</chem>                      |
| Ebeiedinone  | <chem>C[C@H]1CC[C@H]2[C@@H]([C@H]3CC[C@@H]4[C@H]([C@@H]3)CN2C1</chem>                                                                                          |

|                        |                                                                                                                                                              |
|------------------------|--------------------------------------------------------------------------------------------------------------------------------------------------------------|
|                        | <chem>)C[C@H]5[C@H]4CC(=O)[C@@H]6[C@@]5(CC[C@@H](C6)O)C</chem>                                                                                               |
| Forticine              | <chem>C[C@H]1CC[C@@]2(C)[C@@H](C)[C@@]3(C)CC[C@@]4(C)[C@]5(C)C[C@@H](C)[C@@]6(C)C[C@@H](C)CC[C@]6(C)[C@@]5(C)C[C@@]4(C)[C@]3(C)CC2C1</chem>                  |
| Eduardinine            | <chem>[H][C@]12C[C@@H](O)CC[C@]1(C)[C@@]([H])(C[C@]3([H])[C@@]4([H])C[C@@]5([H])[C@@]3([H])CN6[C@](CC[C@H](C)C6)([H])[C@@H]5C)[C@@]4([H])C[C@@H]2O</chem>    |
| Puqiedine              | <chem>C[C@@H]1CC[C@@]2([H])[C@H](C)[C@@]3([H])CC[C@@]4([H])[C@]5([H])C[C@@H](O)[C@@]6([H])C[C@@H](O)CC[C@]6(C)[C@@]5([H])C[C@@]4([H])[C@]3([H])CN2C1</chem>  |
| Lichuanine             | <chem>C[C@@H]1CC[C@@]2([H])[C@@H](C)[C@@]3([H])CC[C@@]4([H])[C@]5([H])C[C@@H](O)[C@@]6([H])C[C@@H](O)CC[C@]6(C)[C@@]5([H])C[C@@]4([H])[C@]3([H])CN2C1</chem> |
| Petilidine             | <chem>C[C@@H]1CC[C@@]2([H])[C@H](C)[C@@]3([H])CC[C@@]4([H])[C@]5([H])C[C@H](O)[C@@]6([H])C[C@@H](O)CC[C@]6(C)[C@@]5([H])C[C@@]4([H])[C@]3([H])CN2C1</chem>   |
| N-oxide of verticinone | <chem>C[C@H](C1)CC[C@@]2([H])[C@](O)(C)[C@@]3([H])CC[C@@]4([H])[C@]5([H])CC([C@@]6([H])C[C@@H](O)CC[C@]6(C)[C@@]5([H])C[C@@]4([H])[C@]3([H])CN21=O)=O</chem> |
| Edpetilidine           | <chem>O[C@H]1CC[C@@]2(C)[C@]([C@H](O)C[C@]3([H])[C@]2([H])C[C@]4([H])C3CC[C@@]5([H])[C@@]4([H])CN6[C@](CC[C@H](C)C6)([H])[C@@H]5C)(</chem>                   |

|                     |                                                                                                                                               |
|---------------------|-----------------------------------------------------------------------------------------------------------------------------------------------|
|                     | [H])C1                                                                                                                                        |
| Imperialine         | O[C@H]1CC[C@@]2(C)[C@](C(C[C@]3([H])[C@]2([H])C[C@]4([H])[C@@]3([H])CC[C@]5([H])[C@@]4([H])CN6[C@](CC[C@H](C)C6)([H])[C@]5(O)C=O)([H])C1      |
| Imperiazine         | O[C@H]1CC[C@@]2(C)[C@](C(C[C@]3([H])[C@]2([H])C[C@]4([H])[C@@]3([H])CC[C@]5([H])[C@@]4([H])CN6[C@](CC[C@@H](C)C6)([H])[C@]5(O)C=O)([H])C1     |
| Petine              | O[C@H]1CC[C@@]2(C)[C@]([C@H](O)C[C@]3([H])[C@]2([H])C[C@]4([H])[C@@]3([H])CC[C@]5([H])[C@@]4([H])CN6[C@](CC[C@@H](C)C6)([H])[C@]5(O)C)([H])C1 |
| Huphenine(delavine) | O[C@H]1CC[C@@]2(C)[C@]([C@H](O)C[C@]3([H])[C@]2([H])C[C@]4([H])[C@@]3([H])CC[C@]5([H])[C@@]4([H])CN6[C@](CC[C@H](C)C6)([H])[C@@H]5C)([H])C1   |
| Huphenizine         | O=C1CC[C@@]2(C)[C@]([C@H](O)C[C@]3([H])[C@]2([H])C[C@]4([H])[C@@]3([H])CC[C@]5([H])[C@@]4([H])CN6[C@](CC[C@H](C)C6)([H])[C@@H]5C)([H])C1      |
| Zhebeirine          | [H][C@]12[C@]3([H])CC([C@@]4([H])C[C@@H](O)CC[C@]4(C)[C@@]3([H])C[C@@]1([H])[C@@]5([H])[C@]([C@](C)([H])[C@@](CCC(CC)C6)([H])N6C5)([H])CC2)=O |
| Ebeienine           | [H][C@]12[C@]3([H])CC([C@@]4([H])C[C@@H](OC(C)=O)CC[C@]4(C)[C@@]3([H])C[C@@]1([H])[C@@]5([H])[C@]([C@](C)(O)[C@@](CCC(CC)C6)([                |

|                                                     |                                                                                                                                                                                                      |
|-----------------------------------------------------|------------------------------------------------------------------------------------------------------------------------------------------------------------------------------------------------------|
|                                                     | <chem>H]N6C5)([H])CC2)=O</chem>                                                                                                                                                                      |
| Harermine(persicanidine B)                          | <chem>O[C@H]1CC[C@@]2(C)[C@]([C@H](O)C[C@]3([H])[C@]2([H])C[C@]4([H])[C@@]3([H])CC[C@]5([H])[C@@]4([H])CN6[C@](CC[C@@H](C)C6)([H])[C@@H]5C)([H])C1</chem>                                            |
| Siechuansine                                        | <chem>O[C@H]1CC[C@@]2(C)[C@]([C@@H](O)C[C@]3([H])[C@]2([H])C[C@]4([H])[C@@]3([H])CC[C@@]5([H])[C@]4([H])CN6[C@@](CC[C@H](C)C6)([H])[C@]5(O)C)([H])C1</chem>                                          |
| (3β,5α,6α)-6,20-dihydroxycevan-3-yl acetate         | <chem>[H][C@]12[C@]3([H])CC([C@@]4([H])C[C@@H](O)CC[C@]4(C)[C@@]3([H])C[C@@]1([H])[C@@]5([H])[C@]([C@](C)(O)[C@@](CCC(CC)C6)([H])N6C5)([H])CC2)=O</chem>                                             |
| Tortifoline(songbeinine)                            | <chem>O[C@H]1CC[C@@]2(C)[C@]([C@H](O)C[C@]3([H])[C@]2([H])C[C@]4([H])[C@@]3([H])CC[C@]5([H])[C@@]4([H])CN6[C@@](CC[C@H](C)C6)([H])[C@@H]5C)([H])C1</chem>                                            |
| Songbeinone                                         | <chem>O[C@H]1CC[C@@]2(C)[C@](C(C[C@]3([H])[C@]2([H])C[C@]4([H])[C@@]3([H])CC[C@]5([H])[C@@]4([H])CN6[C@@](CC[C@H](C)C6)([H])[C@@H]5C)=O)([H])C1</chem>                                               |
| Hupehenizioside(delavinone-3-O-β-D-glucopyranoside) | <chem>[H][C@]12C[C@@H](O[C@]3([H])O[C@H](CO)[C@@H](O)[C@H](O)[C@H]3O)CC[C@]1(C)[C@]4([H])[C@@]([C@@](CC[C@]5([H])[C@@]6([H])CN7[C@@](CC[C@H](C)C7)([H])[C@@H]5C)([H])[C@@]6([H])C4)([H])CC2=O</chem> |
| Hupeheninoside                                      | <chem>[H][C@]12C[C@H](O[C@]3([H])O[C@H](CO)[C@@H](O)[C@H](O)[C@H]3O)CC[C@]1(C)[C@]4([H])[C@@]([C@@](CC[C@@]5([H])[C@@]6([H])CN7[</chem>                                                              |

|                |                                                                                                                                                                                                           |
|----------------|-----------------------------------------------------------------------------------------------------------------------------------------------------------------------------------------------------------|
|                | <chem>C@](CC[C@H](C)C7)([H])[C@@H]5C)([H])[C@@]6([H])C4)([H])C[C@@H]2O</chem>                                                                                                                             |
| Hupehemonoside | <chem>[H][C@]12C[C@@H](O[C@]3([H])O[C@H](CO)[C@@H](O)[C@H](O)[C@H]3O)CC[C@]1(C)[C@]4([H])[C@@]([C@@](CC[C@]5([H])[C@@]6([H])CN7[C@@](CC[C@H](C)C7)([H])[C@]5(O)C)([H])[C@@]6([H])C4)([H])CC2=O</chem>     |
| Peiminoside    | <chem>[H][C@]12C[C@@H](O[C@]3([H])O[C@H](CO)[C@@H](O)[C@H](O)[C@H]3O)CC[C@]1(C)[C@]4([H])[C@@]([C@@](CC[C@@]5([H])[C@@]6([H])CN7[C@](CC[C@H](C)C7)([H])[C@]5(O)C)([H])[C@@]6([H])C4)([H])C[C@@H]2O</chem> |
| Yibeinoside A  | <chem>[H][C@]12C[C@@H](O[C@H]3O[C@@H](CO)[C@H](O)[C@@H](O)[C@@H]3O)CC[C@]1(C)[C@]4([H])[C@@]([C@@](CC[C@]5([H])[C@@]6([H])CN7[C@](CC[C@H](C)C7)([H])[C@@H]5C)([H])[C@@]6([H])C4)([H])CC2=O</chem>         |
| Yibeinoside B  | <chem>[H][C@]12C[C@@H](O[C@H]3[C@H](O)[C@@H](O)[C@H](O)[C@@H](CO)O3)CC[C@]1(C)[C@]4([H])[C@@]([C@@](CC[C@]5([H])[C@@]6([H])CN7[C@](CC[C@H](C)C7)([H])[C@@H]5C)([H])[C@@]6([H])C4)([H])CC2=O</chem>        |
| Delavinone     | <chem>C[C@H]1CC[C@H]2[C@@H]([C@@H]3CC[C@@H]4[C@H]([C@@H]3CN2C1)C[C@H]5[C@H]4CC(=O)[C@@H]6[C@@]5(CC[C@@H](C6)O)C)C</chem>                                                                                  |
| Baimonidine    | <chem>O[C@@H]1CC[C@@]2(C)[C@]([C@H](O)CC3[C@]2([H])C[C@]4([H])[C@@]3([H])CC[C@@]5([H])[C@@]4([H])CN6[C@](CC[C@H](C)C6)([H])[C@]5(O)C)([H])C1</chem>                                                       |
| Isobaimonidine | <chem>O[C@H]1CC[C@@]2(C)[C@]([C@@H](O)C[C@]3(C)[C@]2([H])C[C@]4([H])</chem>                                                                                                                               |

|                                     |                                                                                                                                                                                                       |
|-------------------------------------|-------------------------------------------------------------------------------------------------------------------------------------------------------------------------------------------------------|
|                                     | <chem>[C@@]3([H])CC[C@]5([H])[C@@]4([H])CN6[C@](CC[C@H](C)C6)([H])[C@]5(O)C([H])C1</chem>                                                                                                             |
| Hupeheninate                        | <chem>[H][C@]12C[C@@H](OC(C)=O)CC[C@]1(C)[C@]3([H])[C@@]([C@@](CC[C@]4([H])[C@@]5([H])CN6[C@](CC[C@H](C)C6)([H])[C@@H]4C)([H])[C@]5([H])C3)(C)C[C@H]2O</chem>                                         |
| Hupehenirine                        | <chem>O[C@H]1CC[C@@]2(C)[C@](C(C[C@]3(C)[C@]2([H])C[C@]4([H])[C@@]3([H])CC[C@]5([H])[C@@]4([H])CN6[C@](CC[C@H](C)C6)([H])[C@@H]5C)=O)([H])C1</chem>                                                   |
| Yubeinine                           | <chem>O[C@@H]1CC[C@@]2(C)[C@](C(C[C@]3(C)[C@]2([H])C[C@]4([H])[C@@]3([H])CC[C@]5([H])[C@@]4([H])CN6[C@](CC[C@H](C)C6)([H])[C@]5(O)C=O)([H])C1</chem>                                                  |
| Puqiedinone-3-O-b-D-glucopyranoside | <chem>[H][C@@]12[C@]([C@@H](C)[C@@](CC[C@@H](C)C3)([H])N3C2)([H])CC[C@@]4([H])[C@]5([H])CC([C@@]6([H])C[C@@H](O[C@]7([H])O[C@H](CO)[C@@H](O)[C@H](O)[C@H]7O)CC[C@]6(C)[C@@]5([H])C[C@]41[H])=O</chem> |
| Yubeiside                           | <chem>O=C1CC[C@@]2(C)[C@]([C@H](O[C@@]3([H])[C@H](O)[C@@H](O)[C@H](O)[C@@H](CO)O3)C[C@]4(C)[C@]2([H])C[C@]5([H])[C@@]4([H])CC[C@@]6([H])[C@@]5([H])CN7[C@](CC[C@H](C)C7)([H])[C@@H]6C)([H])C1</chem>  |
| Petilinine                          | <chem>O[C@@H]1CC[C@@]2(C)[C@]([C@@H](O)C[C@]3(C)[C@]2([H])C[C@]4([H])[C@@]3([H])CC[C@@]5([H])[C@@]4([H])CN6[C@](CC[C@@H](C)C6)([H])[C@@H]5C)([H])C1</chem>                                            |
| Verticine N-oxide                   | <chem>O[C@H]1CC[C@@]2(C)[C@]([C@@H](O)C[C@]3([H])[C@]2([H])C[C@]4([</chem>                                                                                                                            |

|                        |                                                                                                                                                                                                     |
|------------------------|-----------------------------------------------------------------------------------------------------------------------------------------------------------------------------------------------------|
|                        | <chem>H)[C@@]3([H])C[C@@H](C)C5[C@@]4([H])C[N+]6([O-])[C@](CC[C@H](C)C6)([H])[C@]5(O)C)([H])C1</chem>                                                                                               |
| Imperialine N-oxide    | <chem>O[C@H]1CC[C@@]2(C)[C@](C(C[C@]3([H])[C@]2([H])C[C@]4([H])[C@@]3([H])CC([H])C5[C@@]4([H])C[N+]6([O-])[C@](CC[C@H](C)C6)([H])[C@]5(O)C)=O)([H])C1</chem>                                        |
| Petine N-oxide         | <chem>O[C@H]1CC[C@@]2(C)[C@]([C@H](O)C[C@]3([H])[C@]2([H])C[C@]4([H])[C@@]3([H])CC([H])C5[C@@]4([H])C[N+]6([O-])[C@](CC[C@@H](C)C6)([H])[C@]5(O)C)([H])C1</chem>                                    |
| Isoverticine-β-N-oxide | <chem>O[C@H]1CC[C@@]2(C)[C@]([C@H](O)C[C@]3([H])[C@]2([H])C[C@]4([H])[C@@]3([H])CC([H])C5[C@@]4([H])C[N+]6([O-])[C@](CC[C@H](C)C6)([H])[C@]5(O)C)([H])C1</chem>                                     |
| Lichuanisinine         | <chem>O[C@H]1CC[C@@]2(C)[C@]([C@H](O)C[C@]3([H])[C@]2([H])C[C@]4([H])[C@@]3([H])CC([H])C5[C@@]4([H])C[N+]6([O-])[C@](CC[C@H](C)C6)([H])[C@H]5C)([H])C1</chem>                                       |
| Zhebeininoside         | <chem>C[C@H]1O[C@](O[C@@H]2C[C@@]([C@@H](O)C[C@]3([H])[C@]4([H])C5[C@@]3([H])CC[C@@]6([H])[C@@]5([H])CN7[C@@](CC[C@@H](C)C7)(C)[C@@]6(C)O)([H])[C@]4(C)CC2)([H])[C@H](O)[C@@H](O)[C@@H]1O.CO</chem> |
| Delafrine              | <chem>C[C@@]12[C@@](C(O)C[C@]3([H])[C@]2([H])C[C@]4([H])[C@@]3([H])C[C@H](O)[C@@]5([H])[C@@]4([H])CN6[C@](CC[C@H](C)C6)([H])[C@@H]5C)([H])C[C@@H](O)CC1</chem>                                      |

|                            |                                                                                                                                                                      |
|----------------------------|----------------------------------------------------------------------------------------------------------------------------------------------------------------------|
| Ddelafrinone               | <chem>O[C@H]1CC[C@@]2(C)[C@](C(C[C@]3([H])[C@]2([H])C[C@]4([H])[C@@]3([H])C[C@H](O)[C@@]5([H])[C@@]4([H])CN6[C@](CC[C@H](C)C6)([H])[C@@H]5C)=O)([H])C1</chem>        |
| Pingbeimine B              | <chem>O[C@H]1CC[C@@]2(C)[C@]([C@@H](O)C[C@]3([H])[C@]2([H])C[C@]4(O)[C@@]3(O)C[C@H](O)[C@]5([H])[C@@]4([H])CN6[C@](CC[C@H](C)C6)([H])[C@]5(O)C)([H])C1</chem>        |
| Pingbeimine C              | <chem>O[C@H]1CC[C@@]2(C)[C@](C([C@@H](O)[C@]3([H])[C@]2([H])C[C@]4([H])[C@@]3(O)C[C@H](O)[C@@]5([H])[C@@]4([H])CN6[C@](CC[C@H](C)C6)([H])[C@]5(O)C)=O)([H])C1</chem> |
| Persicanidine A            | <chem>O[C@H]1CC[C@@]2(C)[C@]([C@H](O)C[C@]3([H])[C@]2([H])C[C@]4([H])[C@@]3([H])CC[C@]5([H])[C@]4([H])CN6[C@](CC[C@@H](C)C6)([H])[C@@H]5C)([H])C1</chem>             |
| Fritillarizine(solanidine) | <chem>O[C@@H](C1)CC[C@@]2(C)C1=CC[C@]3([H])[C@]2([H])C[C@]4([H])[C@@]3([H])CC[C@@]5([H])[C@@]4([H])CN6[C@](CC[C@H](C)C6)([H])[C@]5(O)C</chem>                        |
| Shinonomenine              | <chem>O[C@H](C1)CC[C@@]2(C)C1=CC[C@]3([H])[C@]2([H])C[C@]4([H])[C@@]3([H])CC[C@@]5([H])[C@@]4([H])CN6[C@](CC[C@H](C)C6)([H])[C@H]5C</chem>                           |
| Iso-shinonomenine          | <chem>O[C@H](C1)CC[C@@]2(C)C1=CC[C@]3([H])[C@]2([H])C[C@]4([H])[C@@]3([H])CC[C@@]5([H])[C@@]4([H])CN6[C@](CC[C@H](C)C6)([H])[C@@H]5C</chem>                          |
| Ziebeimine                 | <chem>O[C@@H]1CC[C@@]2(C)[C@]([C@H](O)C[C@]3([H])[C@]2([H])C[C@]4([H])</chem>                                                                                        |

|               |                                                                                                                                                                       |
|---------------|-----------------------------------------------------------------------------------------------------------------------------------------------------------------------|
|               | <chem>H)[C@@]3([H])CCC5=C4CN6[C@](CC[C@@H](C)C6)([H])[C@@H]5C)([H])C1</chem>                                                                                          |
| Ebeinone      | <chem>O[C@H]1CC[C@@]2(C)[C@](C(C[C@]3([H])[C@]2([H])C[C@]4([H])[C@@]3([H])CCC5=C4CN6[C@](CC[C@@H](C)C6)([H])[C@@H]5C)=O)([H])C1</chem>                                |
| Impericine    | <chem>O[C@H]1CC[C@]2(C)[C@]3([H])[C@@]([C@@](C[C@H](O)[C@@]4([H])[C@@]5([H])CN6[C@](C=C[C@H](C)C6)([H])[C@@H]4C)([H])[C@@]5([H])C3)([H])C[C@@H](O)[C@]([H])2C1</chem> |
| Heilonine     | <chem>O[C@H]1CC[C@]2(C)[C@]3([H])[C@@](C4=CC=C([C@@H](C)[C@@](CC[C@@H](C)C5)([H])N5C6)C6=C4C3)([H])C[C@@H](O)[C@]([H])2C1</chem>                                      |
| Ussuriedine   | <chem>O[C@H]1CC[C@]2(C)[C@]3([H])[C@@](C4=CC=C([C@H](C)C(CCC5C6)N6[C@]7(C5)O)C7=C4C3)([H])C[C@@H](O)[C@@]2([H])C1</chem>                                              |
| Ussuriedinone | <chem>O[C@H](C[C@]12[H])CC[C@]2(C)[C@]3([H])[C@@](C4=CC=C([C@H](C)C(CCC5C6)N6[C@]7(C5)O)C7=C4C3)([H])CC1=O</chem>                                                     |
| Ussurienine   | <chem>O[C@H]1CC[C@]2(C)[C@]3([H])[C@@](C(C=CC4=C5[C@](OC)(C6)[N@@]7[C@](CC[C@@]6([H])C7)([H])[C@@H]4C)=C5C3)([H])C[C@@H](O)[C@@]2([H])C1</chem>                       |
| Ussurienone   | <chem>O[C@H](C[C@]12[H])CC[C@]2(C)[C@]3([H])[C@@](C(C=CC4=C5[C@](OC)(C6)[N@@]7[C@](CC[C@H]6C7)([H])[C@@H]4C)=C5C3)([H])CC1=O</chem>                                   |
| Pingbeinone   | <chem>C[C@H]1CC[C@]([C@H](C)[C@@]2([H])[C@]3([H])[C@@](C4)(O)[C@@]([C@@](C5)([H])[C@@]4([H])[C@]6(C)[C@@](C[C@@H](O)CC6)([H])C5=O)([H])CC2)([H])N3C1</chem>           |

|               |                                                                                                                                                                 |
|---------------|-----------------------------------------------------------------------------------------------------------------------------------------------------------------|
| Korseverine   | <chem>O[C@H](C[C@]12[H])CC[C@]2(C)C3=C([C@@](CC[C@@]4([H])[C@@]5([H])CN6[C@](CC[C@H](C)C6)([H])[C@@H]4C)([H])[C@@]5([H])C3)CC1=O</chem>                         |
| Korsine       | <chem>O[C@H]1CC[C@]2(C)C3=C([C@@](CC[C@@]4([H])[C@@]5([H])CN6[C@](C[C@H](O)C[C@@H](C)C6)([H])[C@@H]4C)([H])[C@@]5([H])C3)C[C@@H](O)[C@]([H])2C1</chem>          |
| Korseveriline | <chem>O[C@@H]1CC[C@]2(C)[C@]3([H])[C@@]([C@@](CC[C@@]4([H])[C@@]5([H])CN6[C@](CC[C@@H](C)C6)([H])[C@@H]4C)(O)[C@@]5([H])C3)([H])C[C@@H](O)[C@]([H])2C1</chem>   |
| Edpetisine    | <chem>O=C1CC[C@]2(C)C3=C([C@@](CC[C@@]4([H])[C@@]5([H])CN6[C@](CC[C@H](C)C6)([H])[C@]4(O)C)([H])[C@@]5([H])C3)CC[C@]([H])2C1</chem>                             |
| Korselidine   | <chem>O[C@H]1CC[C@]2(C)[C@]3([H])[C@@]([C@@](CC[C@@]4([H])[C@@]5([H])CN6[C@](CC[C@@H](C)C6)([H])[C@]4(O)C)([H])[C@@]5([H])C3)([H])C[C@@H](O)[C@]([H])2C1</chem> |
| Edpetisidine  | <chem>O[C@@H]1CC[C@]2(C)C3=C([C@@](CC[C@@]4([H])[C@@]5([H])CN6[C@](CC[C@@H](C)C6)([H])[C@]4(O)C)([H])[C@@]5([H])C3)C[C@@H](O)[C@]([H])2C1</chem>                |
| Korseveridine | <chem>O[C@H]1CC[C@]2(C)[C@@]3([H])C[C@]4([H])C([C@H](O)C[C@@]5([H])[C@@]4([H])CN6[C@](CC[C@@H](C)C6)([H])[C@@H]5C)=C3CC[C@]([H])2C1</chem>                      |
| Korseveramine | <chem>O[C@@H]1CC[C@]2(C)[C@@]3([H])C[C@]4([H])C([C@@H](O)C[C@@]5([H])[C@@]4([H])CN6[C@](CC[C@@H](C)C6)([H])[C@@H]5C)[C@]3([H])C[</chem>                         |

|                  |                                                                                                                                                                        |
|------------------|------------------------------------------------------------------------------------------------------------------------------------------------------------------------|
|                  | <chem>C@H](O)[C@]([H])2C1</chem>                                                                                                                                       |
| Sewertzidine     | <chem>O[C@H]1CC[C@]2(C)[C@@]3([H])C[C@]4([H])[C@](CC[C@@]5([H])[C@@]4([H])CN6[C@](CC[C@@H](C)C6)([H])[C@@H]5C)(O)[C@]3([H])C[C@@H](O)[C@]([H])2C1</chem>               |
| Persicanidine B  | <chem>C[C@@H]1CC[C@H]2C([C@@H]3CC[C@@H]4[C@H]([C@@H]3CN2C1)C[C@H]5[C@H]4C[C@H]([C@@H]6[C@@]5(CC[C@@H](C6)O)C)O)C</chem>                                                |
| Edpetisinine     | <chem>O[C@@H]1CC[C@]2(C)[C@]3([H])[C@@]([C@@]([C@@H](O)C[C@@]4([H])[C@@]5([H])CN6[C@](CC[C@H](C)C6)([H])[C@@H]4C)([H])[C@@]5([H])C3)([H])C[C@@H](O)[C@]([H])2C1</chem> |
| Severine N-oxide | <chem>C[C@]12CC[C@@H](OC(C)=O)C[C@@]([H])1[C@H](O)C[C@]3([H])[C@]2([H])C[C@]4([H])[C@@]3(O)CC[C@@]5(C)[C@@]4([H])C[N+]6([O-])[C@](C[C@@H](C)C6)([H])[C@@H]5C</chem>    |
| Sevedinine       | <chem>O=C1CC[C@]2(C)[C@]3([H])[C@@]([C@@](CC[C@@]4(C)[C@@]5([H])CN6[C@](CC[C@@H](C)C6)([H])[C@@H]4C)([H])[C@@]5(O)C3)([H])C[C@@H](O)[C@]([H])2C1</chem>                |
| Sevedinedione    | <chem>O=C(C[C@]12[H])CC[C@]2(C)[C@]3([H])[C@@]([C@@](CC[C@@]4([H])[C@@]5([H])CN6[C@](CC[C@@H](C)C6)([H])[C@@H]4C)(O)[C@@]5([H])C3)([H])CC1=O</chem>                    |
| Chuanbeinone     | <chem>C[C@H]1CC[C@]2([H])[C@H](C)[C@]3([H])CC[C@@]4([H])[C@]5([H])CC([C@@]6([H])C[C@@H](O)CC[C@]6(C)[C@@]5([H])C[C@@]4([H])[C@]3([H])CN2C1)=O</chem>                   |

|               |                                                                                                                                                                                                                                                        |
|---------------|--------------------------------------------------------------------------------------------------------------------------------------------------------------------------------------------------------------------------------------------------------|
| Siechuantine  | <chem>O[C@H]1CC[C@]2(C)C3([H])[C@@](C(CC[C@@]4([H])[C@]([H])5O[C@@]67[C@](NCC(C)[C@@H]6O7)([H])[C@H]4C)(O)C5(C)C3)([H])CCC([H])2C1</chem>                                                                                                              |
| Pingpeimine A | <chem>O[C@H]1CC[C@]2(C)[C@]3([H])[C@@]([C@@](C[C@H](O)[C@@]4([H])[C@@]5([H])CN6[C@](CC[C@H](C)C6)([H])[C@]4(O)C)(O)[C@@]5([H])C3)([H])C[C@H](O)[C@]([H])2C1</chem>                                                                                     |
| Walujewine E  | <chem>[H][C@@]12[C@@]([C@@H](C)[C@](CC[C@H](C)C3)([H])N3C2)([H])CC[C@]4([H])[C@]1(C[C@@]([C@]5(C)[C@]6([H])C[C@@H](O[C@]7([H])O[C@@H](CO)[C@@H](O[C@@]8([H])[C@H](O)[C@@H](O)[C@H](O)[C@@H](CO)O8)[C@H](O)[C@H]7O)CC5)([H])[C@@]4([H])CC6=O)[H]</chem> |
| Walujewine D  | <chem>[H][C@@]12[C@@]([C@H](C)[C@](CC[C@H](C)C3)([H])N3C2)([H])CC[C@]4([H])[C@]1(C[C@@]5([H])[C@@]4([H])C[C@H](O)[C@]6([H])[C@]5(C)CC[C@H](O[C@]7([H])O[C@H](CO)[C@@H](O)[C@H](O)[C@H]7O)C6)[H]</chem>                                                 |
| Walujewine C  | <chem>[H][C@@]12[C@@]([C@H](C)[C@](CC[C@H](C)C3)([H])N3C2)([H])CC[C@]4([H])[C@]1(C[C@@]5([H])[C@@]4([H])C[C@H](O)[C@]6([H])[C@]5(C)CC[C@H](O)C6)[H]</chem>                                                                                             |
| Walujewine B  | <chem>[H][C@@]12[C@@]([C@H](C)[C@](CC[C@H](C)C3)([H])N3C2)([H])CC[C@]4([H])[C@]1(C[C@@]5([H])[C@@]4([H])C[C@@H](O)[C@]6([H])[C@]5(C)CC[C@H](O[C@]7([H])O[C@H](CO)[C@@H](O)[C@H](O)[C@H]7O)C6)[H]</chem>                                                |
| Hupehenidine  | <chem>O[C@H](C1)CC[C@]([C@@]1([H])[C@H](O)C2)(C)[C@@H](C)[C@]2([H])[C@@]3([H])CC[C@]([C@]4([H])C3)([H])[C@@H](C)[C@@]5([H])N(C[C@@H](C)CC5)C4=O</chem>                                                                                                 |

|                  |                                                                                                                                                                                           |
|------------------|-------------------------------------------------------------------------------------------------------------------------------------------------------------------------------------------|
| Ningpeisine      | <chem>CN1C[C@H](C)CC[C@@]1([H])[C@@H](C)[C@]2([H])CC[C@@]3([H])[C@]4([H])CC([C@@]5([H])C[C@@H](O)CC[C@]5(C)[C@@]4([H])C[C@@]3([H])[C@H]2C)=O</chem>                                       |
| Ningpeisinocide  | <chem>CN1C[C@H](C)CC[C@@]1([H])[C@@H](C)[C@]2([H])CC[C@@]3([H])[C@]4([H])CC([C@@]5([H])C[C@@H](OC6[C@H]([C@@H]([C@H]([C@H](CO)O6)O)O)O)CC[C@]5(C)[C@@]4([H])C[C@@]3([H])[C@H]2C)=O</chem> |
| Impranine        | <chem>C[C@H]1CC[C@@]([C@@H](C)[C@]2([H])C=C[C@]([C@@](CC([C@]3([H])[C@]4(C)CC[C@H](O)C3)=O)([H])[C@]4([H])C5([H])[C@]5(C)C2)([H])N(C)C1</chem>                                            |
| Dihydroimpranine | <chem>C[C@H]1CC[C@@]([C@@H](C)[C@]2([H])C=C[C@]([C@@](C[C@@H](O)[C@]3([H])[C@]4([H])CC[C@H](O)C3)([H])[C@]4([H])C5([H])[C@]5(C)C2)([H])N(C)C1</chem>                                      |
| Suchengbeisine   | <chem>O=C1C[C@@]2([H])[C@]([C@@]3([H])C[C@]2([H])[C@]4(C)[C@]1([H])C[C@@H](O)CC4)([H])CC[C@@]5([H])[C@@]3(C)OC[C@@H]5[C@@H]6NC[C@@H](C)CC6</chem>                                         |
| Puqienine A      | <chem>CN1C[C@H](C)C[C@@H](O)[C@@]1([H])[C@H](C)[C@]2([H])CC[C@]([C@@](C[C@@H](O)[C@]3([H])[C@]4(C)CC[C@H](O)C3)([H])[C@]4([H])C5([H])C5=C2C</chem>                                        |
| Puqienine B      | <chem>CN1C[C@H](C)C[C@@H](O)[C@@]1([H])[C@H](C)[C@]2([H])CC[C@]([C@@](CC([C@]3([H])[C@]4(C)CC[C@H](O)C3)=O)([H])[C@]4([H])C5([H])C5=C2C</chem>                                            |



|               |                                                                                                                                                     |
|---------------|-----------------------------------------------------------------------------------------------------------------------------------------------------|
|               | <chem>@@]4([H])[C@@]5(C)O[C@@]6(CC[C@H](C)CN6)[C@@H]4C)([H])[C@]5([H])C3)([H])C1</chem>                                                             |
| Pengbeimine B | <chem>C[C@H](CN1C)CC[C@@]21[C@H](C)[C@@]3([H])CC[C@@]4([H])[C@]5([H])CC([C@@]6([H])C[C@@H](O)CC[C@]6(C)[C@@]5([H])C[C@]4([H])[C@]3(C)O2)=O</chem>   |
| Pengbeimine D | <chem>C[C@H](CN1C)CC[C@@]21[C@@H](C)[C@@]3([H])CC[C@@]4([H])[C@]5([H])CC([C@@]6([H])C[C@@H](O)CC[C@]6(C)[C@@]5([H])C[C@]4([H])[C@]3(C)O2)=O</chem>  |
| Pengbeimine C | <chem>O=C1C[C@@]([C@](CC2)([H])C3=C(C)[C@@H]2[C@H](C)[C@H]4[C@H](C)[C@@H](C)CN4C)O)([H])[C@](C3)([H])[C@@]5(C)[C@@]1([H])C[C@H](O)CC5</chem>        |
| Peimisine     | <chem>[H][C@]1([C@H]2C)[C@](C[C@H](C)CN1)([H])O[C@@]32CC[C@@]4([H])[C@]5([H])CC([C@@]6([H])C[C@@H](O)CC[C@]6(C)[C@@]5([H])CC4=C3C)=O</chem>         |
| Yibeissine    | <chem>[H][C@]1([C@H]2C)[C@](C[C@H](C)CN1)([H])O[C@@]32CC[C@@]4([H])[C@]5([H])CC([C@@]6([H])C[C@@H](O)CC[C@]6(C)[C@@]5([H])[C@@H](O)C4=C3C)=O</chem> |
| Tortifolisine | <chem>[H][C@]1([C@H]2C)[C@](C[C@@H](C)CN1)([H])O[C@@]32CC[C@@]4([H])[C@]5([H])CC([C@@]6([H])C[C@@H](O)CC[C@]6(C)[C@@]5([H])CC4=C3C)=O</chem>        |
| Huphenisine   | <chem>[H][C@]1([C@H]2C)[C@](C[C@H](C)CN1)([H])O[C@@]32CC[C@@](C4=C3</chem>                                                                          |

|                                              |                                                                                                                                                                                                            |
|----------------------------------------------|------------------------------------------------------------------------------------------------------------------------------------------------------------------------------------------------------------|
|                                              | <chem>C([H])[C@]5([H])CC[C@@]6([H])C[C@@H](O)CC[C@]6(C)[C@@]5([H])C4=O</chem>                                                                                                                              |
| Songbeisine                                  | <chem>[H][C@]1([C@@H]2C)[C@](C[C@H](C)CN1)([H])O[C@@]32CC[C@@](C4=C3C)([H])[C@]5([H])CC[C@@]6([H])C[C@@H](O)CC[C@]6(C)[C@@]5([H])C4=O</chem>                                                               |
| 23-isokuroyunrinidine                        | <chem>[H][C@]1([C@H]2C)[C@@](C[C@H](C)CN1)([H])O[C@@]32CC[C@@]4([H])[C@]5([H])C[C@@H](O)[C@@]6([H])C[C@H](O)[C@@H](O)C[C@]6(C)[C@@]5([H])CC4=C3C</chem>                                                    |
| Kuroyunrinidine                              | <chem>[H][C@]1([C@@H]2C)[C@](C[C@H](C)CN1)([H])O[C@@]32CC[C@@]4([H])[C@]5([H])C[C@@H](O)[C@@]6([H])C[C@H](O)[C@@H](O)C[C@]6(C)[C@@]5([H])CC4=C3C</chem>                                                    |
| Peimisine-3-O-b-D-glucopyranoside            | <chem>C[C@@]12[C@](C(C[C@]3([H])[C@]2([H])CC4=C(C)[C@@]5(O[C@@](C[C@H](C)NC6)([H])[C@]6(C)[C@H]5C)CC[C@@]34[H])=O)([H])C[C@@H](O[C@]7([H])O[C@H](CO)[C@@H](O)[C@H](O)[C@H]7O)CC1</chem>                    |
| Walujewine A                                 | <chem>[H][C@]1([C@H]2C)[C@](C[C@H](C)CN1)([H])O[C@@]32CC[C@@]4([H])[C@]5([H])CC([C@@]6([H])C[C@@H](O)CC[C@]6(C)[C@@]5([H])C[C@@]4(O)C3=C)=O</chem>                                                         |
| O-β-D-glucopyranosyl-(1→)-β-D-xylopyranoside | <chem>O[C@H]([C@H]1O)[C@H](O[C@]2([H])O[C@H](CO)[C@@H](O)[C@H](O)[C@H]2O)CO[C@@]1([H])O[C@@]3CC([C@]4(C)CC3)=CC[C@@]([C@]4([H])CC5)([H])C([C@@]5(C)[C@@]6([H])[C@H](C)[C@@]7([H])CC[C@H](C)CN7C6)=C</chem> |

|                                                                                                      |                                                                                                                                                                                                                                                                                  |
|------------------------------------------------------------------------------------------------------|----------------------------------------------------------------------------------------------------------------------------------------------------------------------------------------------------------------------------------------------------------------------------------|
| (22R,25s)-solanid-5-enine-3β,5α,6β-triol<br>15,16-seco-22αH,25βH-solanida-5,14-dien-3β-ol            | <chem>O[C@H]1CC[C@@]2(C)[C@]([C@H](O)C[C@]3([H])[C@]2([H])CC[C@@]4(C)[C@@]3([H])C[C@@](N5[C@@]([H])6CC[C@H](C)C5)([H])[C@]4([H])[C@@H]6C)(O)C1</chem>                                                                                                                            |
| Camtschatcanidine                                                                                    | <chem>O[C@H](C1)CC[C@@]2(C)C1=CC[C@]3([H])[C@]2([H])CC[C@@]4(C)[C@@]3([H])C[C@@](N5[C@@]([H])6CC[C@H](CO)C5)([H])[C@]4([H])[C@@H]6C</chem>                                                                                                                                       |
| Solanidine                                                                                           | <chem>O[C@H](C1)CC[C@@]2(C)C1=CC[C@]3([H])[C@]2([H])CC[C@@]4(C)[C@@]3([H])C[C@@](N5[C@@]([H])6CC[C@H](C)C5)([H])[C@]4([H])[C@@H]6C</chem>                                                                                                                                        |
| Solanidine<br>3-O-α-L-rhamnopyranosyl-(1→2)-<br>[ β-D-glucopyranosyl-(1→4)- ]<br>β-D-glucopyranoside | <chem>C[C@]12C(C[C@@H](O[C@]3([H])O[C@H](CO)[C@@H](O[C@]4([H])O[C@@H](CO)[C@@H](O)[C@H](O)[C@H]4O)[C@H](O)[C@H]3O[C@@]5([H])[C@H](O)[C@H](O)[C@@H](O)[C@H](C)O5)CC2)=CC[C@]6([H])[C@]1([H])CC[C@@]7(C)[C@@]6([H])C[C@@](N8[C@@]([H])9CC[C@H](C)C8)([H])[C@]7([H])[C@@H]9C</chem> |
| (22S,25S)-Solanid-5-en-3β-ol                                                                         | <chem>C[C@@H]1CN2[C@@]3([H])C[C@@]4([H])[C@]5([H])CC=C6C[C@@H](O)CC[C@]6(C)[C@@]5([H])CC[C@]4(C)[C@@]3([H])[C@H](C)[C@]2([H])CC1</chem>                                                                                                                                          |
| (22S,25S)-Solanid-5,20(21)-dien-3β-ol                                                                | <chem>C[C@@H]1CN([C@@]2([H])CC1)[C@@]3([H])C[C@@]4([H])[C@]5([H])CC=C6C[C@@H](O)CC[C@]6(C)[C@@]5([H])CC[C@]4(C)[C@@]3([H])C2=C</chem>                                                                                                                                            |
| Hapepunine                                                                                           | <chem>O[C@H]1C[C@@]2([H])[C@]3([H])CC=C4C[C@@H](O)CC[C@]4(C)[C@@]3([H])CC[C@]2(C)[C@@]1([H])[C@H](C)[C@]5([H])CC[C@H](C)CN5C</chem>                                                                                                                                              |
| Anrakorinine                                                                                         | <chem>O[C@H]1C[C@@]2([H])[C@]3([H])CC=C4C[C@@H](O)CC[C@]4(C)[C@@]</chem>                                                                                                                                                                                                         |

|                               |                                                                                                                                                                                                                                  |
|-------------------------------|----------------------------------------------------------------------------------------------------------------------------------------------------------------------------------------------------------------------------------|
|                               | <chem>3([H])CC[C@]2(CO)[C@@]1([H])[C@H](C)[C@]5([H])CC[C@H](C)CN5C</chem>                                                                                                                                                        |
| Pingbeinine                   | <chem>O[C@H]1C[C@@]2([H])[C@]3([H])CC=C4C[C@@H](O)CC[C@]4(C)[C@@]3([H])CC[C@]2(C)[C@@]1([H])[C@H](C)[C@@]5([H])CC[C@@](O)(C)CN5C</chem>                                                                                          |
| Pingbeinoside                 | <chem>O[C@H]1C[C@@]2([H])[C@]3([H])CC=C4C[C@@H](O[C@]5([H])O[C@H](CO)[C@@H](O)[C@H](O)[C@H]5O)CC[C@]4(C)[C@@]3([H])CC[C@]2(C)[C@@]1([H])[C@H](C)[C@@]6([H])CC[C@@](O)(C)CN6C</chem>                                              |
| Hapepunine 3-0-β-cellobioside | <chem>O[C@H]1C[C@@]2([H])[C@]3([H])CC=C4C[C@@H](O[C@]5([H])O[C@H](CO)[C@@H](O[C@]6([H])O[C@H](CO)[C@@H](O)[C@H](O)[C@H]6O)[C@H](O)[C@H]5O)CC[C@]4(C)[C@@]3([H])CC[C@]2(C)[C@@]1([H])[C@H](C)C7([H])CC[C@H](C)CN7C.C</chem>       |
| Pingbeidoside                 | <chem>O[C@@H]1C[C@@]2([H])[C@]3([H])CC=C4C[C@@H](O)CC[C@]4(C)[C@@]3([H])CC[C@]2(C)[C@@]1([H])[C@@](C)(O)[C@@]5([H])CC[C@](O[C@@H]6O[C@H](CO)[C@@H](O)[C@H](O)[C@H]6O)(C)CN5C</chem>                                              |
| Puqietinone                   | <chem>CC(CN1C)CCC1[C@@H](C)[C@@]2([H])CC[C@@]3([H])[C@]4([H])CC([C@@]5([H])C[C@@H](O)CC[C@]5(C)[C@@]4([H])CC[C@@]32C)=O</chem>                                                                                                   |
| Yibeinoside C                 | <chem>C[C@H](CN1)CC[C@]1([H])[C@@H](C)[C@@]2([H])CC[C@@]3([H])[C@]4([H])CC([C@@]5([H])C[C@@H](O[C@]6([H])O[C@H](CO)[C@H](O[C@]7([H])O[C@H](CO)[C@@H](O)[C@H](O)[C@H]7O)[C@H](O)[C@H]6O)CC[C@]5(C)[C@@]4([H])CC[C@@]32C)=O</chem> |
| Puqietinonoside               | <chem>C[C@H]1CC[C@@H](N(C1)C)[C@@H](C)[C@H]2CC[C@@H]3[C@@]2(CC[</chem>                                                                                                                                                           |

|                                                                                                                         |                                                                                                                                                                        |
|-------------------------------------------------------------------------------------------------------------------------|------------------------------------------------------------------------------------------------------------------------------------------------------------------------|
|                                                                                                                         | <chem>C[C@H]4[C@H]3CC(=O)[C@@H]5[C@@]4(CC[C@@H](C5)O[C@H]6[C@@H]([C@H]([C@@H]([C@H](O6)CO)O)O)O)C</chem>                                                               |
| N-demethylpuqietinone                                                                                                   | <chem>C[C@H]1CC[C@@H](NC1)[C@@H](C)[C@H]2CC[C@@H]3[C@@]2(CC[C@@H]4[C@H]3CC(=O)[C@@H]5[C@@]4(CC[C@@H](C5)O)C)C</chem>                                                   |
| ( 20R,25R ) -23 ,<br>26-epimino-3β-hydroxy-5α-cholest-23(N )<br>-ene-6,22-dione                                         | <chem>C[C@@]12[C@@]([H])(CCC2[C@@H](C(C3=NCC(C)C3)=O)C)[C@]4([H])C[C@@]5([H])C[C@@H](O)CC[C@]5(C)[C@@]4([H])CC1=O</chem>                                               |
| ( 20R,25R ) -23 ,<br>26-epimino-3β-hydroxy-5α-cholest-23(N )<br>-ene-6, 22-dione-3-0-β-D-glucopyranoside<br>cbeietinone | <chem>C[C@@]12[C@@]([H])(CCC2[C@@H](C(C3=NCC(C)C3)=O)C)[C@]4([H])C[C@@]5([H])C[C@@H](O[C@]6([H])O[C@H](CO)[C@@H](O)[C@H](O)[C@H]6O)CC[C@]5(C)[C@@]4([H])CC1=O</chem>   |
| ( 25R ) -23 ,<br>26-epimino-3β-hydroxy-5α-cholest-23(N )<br>-ene-6,22-dione                                             | <chem>C[C@@]12[C@@]([H])(CCC2[C@@H](C(C3=NCC(C)C3)=O)C)[C@]4([H])CC([C@@]5([H])C[C@@H](O)CC[C@]5(C)[C@@]4([H])CC1=O</chem>                                             |
| ( 25R ) -23 ,<br>26-epimino-3β-hydroxy-5α-cholest-23(N )<br>-ene-6,22-dione 3-O-β-D-glucopyranoside                     | <chem>C[C@@]12[C@@]([H])(CCC2[C@@H](C(C3=NCC(C)C3)=O)C)[C@]4([H])CC([C@@]5([H])C[C@@H](O[C@]6([H])O[C@H](CO)[C@@H](O)[C@H](O)[C@H]6O)CC[C@]5(C)[C@@]4([H])CC1=O</chem> |
| 25-Isosolafloridine                                                                                                     | <chem>C[C@H]1CCC([C@@H](C)[C@@]2([H])[C@H](O)C[C@@]3([H])[C@]4([H])CC[C@@]5([H])C[C@@H](O)CC[C@]5(C)[C@@]4([H])CC[C@@]32C)=NC1</chem>                                  |
| Ebeietinone                                                                                                             | <chem>C[C@H]1CCC([C@@H](C)[C@@]2([H])CC[C@@]3([H])[C@]4([H])CC([C@]</chem>                                                                                             |

|                |                                                                                                                                             |
|----------------|---------------------------------------------------------------------------------------------------------------------------------------------|
|                | <chem>5(O)C[C@@H](O)CC[C@]5(C)[C@@]4([H])CC[C@@]32C=O)=NC1</chem>                                                                           |
| Fetisinine     | <chem>CC(C=N1)=CC(O)=C1[C@@H](C)[C@@]2([H])CC[C@@]3([H])[C@]4([H])C<br/>C([C@@]5([H])C[C@H](O)CC[C@]5(C)[C@@]4([H])CC[C@@]32C)=O</chem>     |
| Puqietinedione | <chem>C[C@H](CN1C)CC[C@]1([H])[C@@H](C)[C@@]2([H])CC[C@@]3([H])[C@]<br/>4([H])CC([C@@]5([H])CC(CC[C@]5(C)[C@@]4([H])CC[C@@]32C)=O)=O</chem> |

Table SII. Survival rates of A549 cells treated with eight alkaloids for 48 h.

| Alkaloid                                | Concentration, $\mu\text{M}$ |                               |                               |                               |                                |                                |
|-----------------------------------------|------------------------------|-------------------------------|-------------------------------|-------------------------------|--------------------------------|--------------------------------|
|                                         | 1                            | 5                             | 10                            | 15 $\mu\text{M}$              | 30 $\mu\text{M}$               | 60 $\mu\text{M}$               |
| Imperialine                             | -                            | -                             | -                             | 91.88 $\pm$ 10.26             | 90.20 $\pm$ 7.6u1              | 100.27 $\pm$ 5.67              |
| Verticinone                             | 93.93 $\pm$ 1.86             | 81.07 $\pm$ 7.18 <sup>a</sup> | 78.03 $\pm$ 9.02 <sup>b</sup> | 78.30 $\pm$ 8.71 <sup>b</sup> | 65.00 $\pm$ 11.15 <sup>c</sup> | 66.77 $\pm$ 9.80 <sup>c</sup>  |
| Verticine                               | -                            | -                             | -                             | 91.63 $\pm$ 11.43             | 85.73 $\pm$ 3.93               | 101.13 $\pm$ 7.43              |
| Imperialine-3- $\beta$ -<br>D-glucoside | -                            | -                             | -                             | 89.78 $\pm$ 2.82              | 90.03 $\pm$ 7.44               | 97.27 $\pm$ 5.52               |
| Delavine                                | 101.60 $\pm$ 4.35            | 89.73 $\pm$ 2.16              | 86.50 $\pm$ 5.43              | 83.53 $\pm$ 4.33 <sup>a</sup> | 81.27 $\pm$ 6.18 <sup>a</sup>  | 82.43 $\pm$ 7.20 <sup>a</sup>  |
| Peimisine                               | -                            | -                             | -                             | 97.33 $\pm$ 11.21             | 96.80 $\pm$ 11.06              | 109.40 $\pm$ 3.72              |
| Ebeiedinone                             | 94.83 $\pm$ 5.85             | 90.23 $\pm$ 1.747             | 81.87 $\pm$ 9.87 <sup>a</sup> | 71.45 $\pm$ 6.69 <sup>b</sup> | 67.00 $\pm$ 5.56 <sup>b</sup>  | 57.73 $\pm$ 13.59 <sup>b</sup> |
| Delavinone                              | -                            | -                             | -                             | 93.65 $\pm$ 5.28              | 91.80 $\pm$ 7.14               | 99.47 $\pm$ 7.18               |

<sup>a</sup>P<0.05, <sup>b</sup>P<0.01, <sup>c</sup>P<0.001, vs. control.

Table SIII. Survival rates of NCI-H1299 cells treated with eight alkaloids for 48h (%)

| Alkaloid                               | Concentration, $\mu\text{M}$ |                  |                               |                               |                               |                                |
|----------------------------------------|------------------------------|------------------|-------------------------------|-------------------------------|-------------------------------|--------------------------------|
|                                        | 1                            | 5                | 10 $\mu\text{M}$              | 15 $\mu\text{M}$              | 30 $\mu\text{M}$              | 60 $\mu\text{M}$               |
| Imperialine                            | -                            | -                | -                             | 90.50 $\pm$ 3.25              | 89.03 $\pm$ 5.58              | 86.35 $\pm$ 3.89               |
| Verticinone                            | 95.73 $\pm$ 4.21             | 85.93 $\pm$ 5.25 | 80.40 $\pm$ 9.27 <sup>a</sup> | 75.20 $\pm$ 3.80 <sup>a</sup> | 77.37 $\pm$ 9.59 <sup>a</sup> | 74.90 $\pm$ 10.89 <sup>b</sup> |
| Verticine                              | -                            | -                | -                             | 94.20 $\pm$ 5.52              | 97.20 $\pm$ 8.58              | 93.25 $\pm$ 13.93              |
| Imperialine-3-<br>$\beta$ -D-glucoside | -                            | -                | -                             | 90.20 $\pm$ 4.10              | 99.83 $\pm$ 7.81              | 98.15 $\pm$ 10.96              |
| Delavine                               | 97.77 $\pm$ 3.41             | 94.97 $\pm$ 3.40 | 89.10 $\pm$ 2.63              | 85.23 $\pm$ 7.46              | 86.50 $\pm$ 4.78              | 83.05 $\pm$ 6.86 <sup>a</sup>  |
| Peimisine                              | -                            | -                | -                             | 95.70 $\pm$ 3.68              | 103.27 $\pm$ 6.59             | 103.35 $\pm$ 12.80             |
| Ebeiedinone                            | 95.17 $\pm$ 2.64             | 91.27 $\pm$ 8.02 | 83.80 $\pm$ 2.16 <sup>a</sup> | 82.73 $\pm$ 9.34 <sup>a</sup> | 74.03 $\pm$ 3.63 <sup>b</sup> | 65.10 $\pm$ 0.99 <sup>c</sup>  |
| Delavinone                             | -                            | -                | -                             | 99.75 $\pm$ 0.636             | 103.80 $\pm$ 5.78             | 101.15 $\pm$ 1.91              |

<sup>a</sup>P<0.05, <sup>b</sup>P<0.01, <sup>c</sup>P<0.001, vs. control.

Table SIV. Survival rate (%) of NCI-H1975 cells treated with eight alkaloids for 48 h.

|                                     | Concentration, $\mu\text{M}$ |                   |
|-------------------------------------|------------------------------|-------------------|
| Compound                            | 15                           | 30 $\mu\text{M}$  |
| Imperialine                         | 116.35 $\pm$ 11.24           | 111.90 $\pm$ 2.69 |
| Verticinone                         | 97.50 $\pm$ 1.41             | 95.80 $\pm$ 6.65  |
| Verticine                           | 117.05 $\pm$ 0.64            | 114.05 $\pm$ 0.49 |
| Imperialine-3- $\beta$ -D-glucoside | 114.80 $\pm$ 4.10            | 114.20 $\pm$ 1.84 |
| Delavine                            | 107.15 $\pm$ 3.89            | 101.20 $\pm$ 5.94 |
| Peimisine                           | 108.35 $\pm$ 3.18            | 109.80 $\pm$ 2.40 |
| Ebeiedinone                         | 92.40 $\pm$ 0.71             | 89.65 $\pm$ 8.98  |
| Delavinone                          | 109.25 $\pm$ 4.74            | 106.65 $\pm$ 5.02 |
